# Supplementary material for: Finding sexual partners online: prevalence and associations with sexual behaviour, STI diagnoses and other sexual health outcomes in the British population
Source: PubMed Central journal article supplement (PMC5739860; doi:10.1136/sextrans-2016-052994), 2017-04-10
Supplement: sextrans-2016-052994supp001.pdf [file sextrans-2016-052994supp001.pdf]

Online supplement 1. Reporting finding partners online in the past year in relation to sexual behaviour and risk perception, for men and women reporting one or more sexual partners, ever

Men reporting one or more sexual partners, ever (n=5698)

Women reporting one or more sexual partners, ever (n=8198)

|                                                                | Prevalence<br>%(95%CI*) | Crude OR <sup>1</sup><br>(95% CI <sup>4</sup> ) | Adjusted OR <sup>1,2</sup><br>(95%CI <sup>4</sup> ) | Denominator <sup>5</sup> | Prevalence<br>%(95%CI <sup>4</sup> ) | Crude OR <sup>1</sup><br>(95% CI <sup>4</sup> ) | Adjusted OR <sup>1,2</sup><br>(95%CI <sup>4</sup> ) | Denominator <sup>5</sup> |  |
|----------------------------------------------------------------|-------------------------|-------------------------------------------------|-----------------------------------------------------|--------------------------|--------------------------------------|-------------------------------------------------|-----------------------------------------------------|--------------------------|--|
| <b>Sexual risk behaviour</b>                                   |                         |                                                 |                                                     |                          |                                      |                                                 |                                                     |                          |  |
| <b>No. of sexual partners, past year</b>                       |                         |                                                 | p<0.0001                                            |                          |                                      |                                                 | p<0.0001                                            |                          |  |
| 1                                                              | 1.8 (1.5-2.3)           | 0.45 (0.29-0.71)                                | 0.42 (0.26-0.67)                                    | 3596, 4855               | 1.1 (0.9-1.4)                        | 0.67 (0.42-1.09)                                | 0.73 (0.40-1.33)                                    | 5470, 5041               |  |
| 2                                                              | 11.3 (8.6-14.8)         | 3.1 (1.90-5.07)                                 | 2.73 (1.57-4.76)                                    | 543, 517                 | 6.7 (4.5-9.9)                        | 4.16 (2.34-7.37)                                | 4.75 (2.18-10.38)                                   | 574, 366                 |  |
| 3-4                                                            | 21.6 (17.2-26.7)        | 6.68 (4.09-10.90)                               | 5.83 (3.31-10.27)                                   | 414, 364                 | 14.2 (10.5-19.0)                     | 9.64 (5.65-16.46)                               | 11.25 (5.06-24.99)                                  | 413, 230                 |  |
| 5+                                                             | 34.5 (28.3-41.3)        | 12.78 (7.88-20.75)                              | 11.19 (6.36-19.67)                                  | 306, 265                 | 20.3 (14.2-28.1)                     | 14.77 (8.17-26.69)                              | 17.44 (7.32-41.52)                                  | 229, 137                 |  |
| <b>Same sex partner, past year</b>                             |                         |                                                 | p<0.0001                                            |                          |                                      |                                                 | p<0.0001                                            |                          |  |
| No                                                             | 4.3 (3.8-4.9)           | 1.00                                            | 1.00                                                | 5537, 6795               | 2.2 (1.9-2.5)                        | 1.00                                            | 1.00                                                | 7980, 6999               |  |
| Yes                                                            | 41.9 (33.2-51.2)        | 15.94 (10.72-23.71)                             | 15.58 (10.36-23.44)                                 | 161, 161                 | 11.7 (7.3-18.2)                      | 5.98 (3.50-10.20)                               | 5.06 (2.93-8.73)                                    | 216, 160                 |  |
| <b>Condomless sex with ≥2 partners, past year</b>              |                         |                                                 | p<0.0001                                            |                          |                                      |                                                 | p<0.0001                                            |                          |  |
| No                                                             | 4.22 (3.7-4.8)          | 1.00                                            | 1.00                                                | 5260, 6474               | 1.9 (1.6-2.2)                        | 1.00                                            | 1.00                                                | 7634, 6776               |  |
| Yes                                                            | 19.2 (14.9-24.4)        | 5.4 (3.87-7.53)                                 | 5.24 (3.71-7.39)                                    | 382, 408                 | 12.6 (9.4-16.9)                      | 7.58 (5.23-10.98)                               | 6.36 (4.25-9.53)                                    | 483, 299                 |  |
| <b>Condomless sex on 1st occasion with most recent partner</b> |                         |                                                 | p=0.9820                                            |                          |                                      |                                                 | p=0.6318                                            |                          |  |
| No                                                             | 4.1 (3.4-4.9)           | 1.00                                            | 1.00                                                | 2441, 3311               | 2.0 (1.6-2.5)                        | 1.00                                            | 1.00                                                | 3394, 3206               |  |
| Yes                                                            | 4.1 (3.4-5.0)           | 1 (0.75-1.34)                                   | 1.29 (0.96-1.74)                                    | 2317, 2710               | 1.8 (1.4-2.4)                        | 0.92 (0.66-1.29)                                | 1.11 (0.78-1.60)                                    | 3741, 3103               |  |
| <b>Concurrent partners, past year</b>                          |                         |                                                 | p<0.0001                                            |                          |                                      |                                                 | p<0.0001                                            |                          |  |
| No                                                             | 3.2 (2.7-3.8)           | 1.00                                            | 1.00                                                | 4005, 5194               | 1.7 (1.4-2.1)                        | 1.00                                            | 1.00                                                | 5841, 5255               |  |
| Yes                                                            | 23.9 (19.4-28.9)        | 9.51 (6.93-13.05)                               | 8.63 (6.18-12.06)                                   | 460, 452                 | 13.6 (9.9-18.5)                      | 9.01 (5.99-13.54)                               | 8.84 (5.63-13.89)                                   | 417, 249                 |  |
| ≥2 partners, unknown if overlapping                            | 12.5 (9.4-16.5)         | 4.34 (3.01-6.26)                                | 3.9 (2.65-5.73)                                     | 436, 406                 | 6.9 (4.4-10.6)                       | 4.22 (2.55-7.01)                                | 4.17 (2.46-7.07)                                    | 477, 315                 |  |

|                                                  |                             |                  |                    |                                |            |                 |                   |                   |            |
|--------------------------------------------------|-----------------------------|------------------|--------------------|--------------------------------|------------|-----------------|-------------------|-------------------|------------|
| <b>Taken drugs to assist sexual performance</b>  |                             |                  | p<0.0001           | p<0.0001                       |            |                 | p=0.0013          | p=0.0059          |            |
|                                                  |                             | 4.2 (3.7-4.7)    | 1.00               | 1.00                           | 4890, 5972 | 2.3 (2.0-2.7)   | 1.00              | 1.00              | 7894, 6926 |
|                                                  | No                          | 12.5 (10.1-15.4) | 3.29 (2.49-4.35)   | 4.05 (3.05-5.38)               | 723, 883   | 5.9 (3.4-9.9)   | 2.61 (1.46-4.69)  | 2.27 (1.27-4.07)  | 198, 138   |
| <b>Paid money for sex, past year<sup>6</sup></b> | Yes                         |                  | p<0.0001           | p<0.0001                       |            |                 | -                 | -                 |            |
|                                                  |                             | 4.9 (4.4-5.5)    | 1.00               | 1.00                           | 5608, 6855 | -               | -                 | -                 | -          |
|                                                  | No                          | 31.3 (20.2-45.3) | 8.87 (4.80-16.39)  | 9.4 (5.02-17.59)               | 71, 81     | -               | -                 | -                 | -          |
|                                                  | Yes                         |                  |                    |                                |            |                 |                   |                   |            |
| <b>Risk perception</b>                           |                             |                  | p<0.001            | p<0.0001                       |            |                 | p<0.0001          | p<0.0001          |            |
| <b>HIV/AIDS risk: to self</b>                    |                             | 2.9 (2.4-3.4)    | 1.00               | 1.00                           | 4013, 5242 | 1.4 (1.2-1.7)   | 1.00              | 1.00              | 6499, 5906 |
|                                                  | Not at all at risk          | 11.8 (10.0-13.8) | 4.52 (3.50-5.84)   | 3.15 (2.38-4.18) <sup>3</sup>  | 1480, 1519 | 6.8 (5.5-8.4)   | 5.12 (3.79-6.92)  | 4.62 (3.37-6.34)  | 1495, 1092 |
|                                                  | Not very much               | 18.6 (13.1-25.8) | 7.75 (4.97-12.08)  | 4.7 (2.99-7.39) <sup>3</sup>   | 169, 153   | 9.8 (5.4-17.2)  | 7.6 (3.92-14.72)  | 6.96 (3.61-13.45) | 158, 124   |
|                                                  | Greatly/quite a lot at risk |                  | p<0.001            | p<0.0001                       |            |                 | p<0.0001          | p<0.0001          |            |
| <b>Other STI risk: to self</b>                   |                             | 2.5 (2.1-3.0)    | 1.00               | 1.00                           | 3821, 5084 | 1.4 (1.1-1.7)   | 1.00              | 1.00              | 6276, 5794 |
|                                                  | Not at all at risk          | 10.4 (8.9-12.2)  | 4.57 (3.49-5.99)   | 3.4 (2.53-4.58) <sup>3</sup>   | 1544, 1567 | 6.1 (4.8-7.6)   | 4.67 (3.42-6.36)  | 4.3 (3.09-5.99)   | 1624, 1149 |
|                                                  | Not very much               | 24.5 (19.0-30.9) | 12.72 (8.71-18.57) | 8.31 (5.54-12.46) <sup>3</sup> | 300, 266   | 11.4 (8.0-16.1) | 9.33 (6.00-14.49) | 8.52 (5.43-13.37) | 256, 180   |
|                                                  | Greatly/quite a lot at risk |                  | p<0.0001           | p<0.0001                       |            |                 | p<0.0001          | p<0.0001          |            |

#### Notes for Online Supplement 1

<sup>1</sup> OR= Odds Ratio

<sup>2</sup> Adjusted for Age

<sup>3</sup> Adjusted for reporting a same sex partner in the past year

<sup>4</sup> CI= Confidence Interval

<sup>5</sup> Unweighted, weighted

<sup>6</sup> Outcome reported for Men only

Online supplement 2. Reporting of sexual health outcomes and health seeking behaviours in relation to finding partners online in the past year, for men and women reporting one or more sexual partners, ever

|                                                    | Men reporting one or more sexual partners, ever<br>(n=5698) |                                                     |          | Women reporting one or more sexual partners,<br>ever (n=8198) |                                                     |          |
|----------------------------------------------------|-------------------------------------------------------------|-----------------------------------------------------|----------|---------------------------------------------------------------|-----------------------------------------------------|----------|
|                                                    | Did not use the internet to find sex partners               | Reported using the internet to find sexual partners | p-value  | Did not use the internet to find sex partners                 | Reported using the internet to find sexual partners | p-value  |
| <b>Health Seeking Behaviour</b>                    |                                                             |                                                     |          |                                                               |                                                     |          |
| <b>Attended sexual health clinic, past year</b>    |                                                             |                                                     |          |                                                               |                                                     |          |
| Reported Prevalence % (95% CI <sup>1</sup> )       | 17.8 (15.8-20.1)                                            | 39 (31.3-47.2)                                      |          | 21.2 (19.30-23.10)                                            | 41 (29.4-53.8)                                      |          |
| OR <sup>2</sup> (95% CI <sup>1</sup> )             | 1.00                                                        | 2.94 (2.03-4.27)                                    | p<0.0001 | 1.00                                                          | 2.59 (1.53-4.38)                                    | 0.0004   |
| Age-Adjusted OR (95% CI <sup>1</sup> )             | -                                                           | 3.48 (2.27-5.33)                                    | p<0.0001 | -                                                             | 4.14 (2.06-8.33)                                    | 0.0001   |
| AOR <sup>2,3</sup> (95%CI <sup>1</sup> )           | -                                                           | 1.66 (1.03-2.68) <sup>4</sup>                       | 0.0378   | -                                                             | 2.25 (1.08-4.69)                                    | 0.0312   |
| Denominators <sup>5</sup>                          | 1233, 1312                                                  | 177, 150                                            |          | 2198, 1522                                                    | 107, 74                                             |          |
| <b>HIV test, past year</b>                         |                                                             |                                                     |          |                                                               |                                                     |          |
| Reported Prevalence % (95% CI <sup>1</sup> )       | 3.0 (2.5-3.6)                                               | 15.0                                                |          | 5.3 (4.8-5.8)                                                 | 13.7 (9.2-19.8)                                     |          |
| OR <sup>2</sup> (95% CI <sup>1</sup> )             | 1.00                                                        | 5.7 (3.98-8.18)                                     | p<0.0001 | 1.00                                                          | 2.83 (1.79-4.47)                                    | p<0.0001 |
| Age-Adjusted OR (95% CI <sup>1</sup> )             | -                                                           | 4.58 (3.17-6.61)                                    | p<0.0001 | -                                                             | 2.27 (1.38-3.76)                                    | 0.0014   |
| AOR <sup>2,3</sup> (95%CI <sup>1</sup> )           | -                                                           | 2.26 (1.44-3.57) <sup>4</sup>                       | 0.0005   | -                                                             | 1.82 (1.09-3.03)                                    | 0.0229   |
| Denominators <sup>5</sup>                          | 5058, 6303                                                  | 372, 341                                            |          | 7492, 6601                                                    | 234, 160                                            |          |
| <b>Chlamydia test, past year (16-44 year olds)</b> |                                                             |                                                     |          |                                                               |                                                     |          |
| Reported Prevalence % (95% CI <sup>1</sup> )       | 14.8 (13.6-16.0)                                            | 32.3% (26.6-38.7)                                   |          | 25.3 (24.0-26.7)                                              | 47% (38.2-55.9)                                     |          |
| OR <sup>2</sup> (95% CI <sup>1</sup> )             | 1.00                                                        | 2.75 (2.06-3.67)                                    | p<0.0001 | 1.00                                                          | 2.61 (1.82-3.75)                                    | p<0.0001 |
| Age-Adjusted OR (95% CI <sup>1</sup> )             | -                                                           | 2.84 (2.03-3.97)                                    | p<0.0001 | -                                                             | 3.19 (1.98-5.13)                                    | p<0.0001 |
| AOR <sup>2,3</sup> (95%CI <sup>1</sup> )           | -                                                           | 1.62 (1.12-2.32) <sup>4</sup>                       | p=0.0095 | -                                                             | 1.88 (1.14-3.10)                                    | 0.0139   |
| Denominators <sup>5</sup>                          | 3295, 3417                                                  | 306, 257                                            |          | 5092, 3562                                                    | 188, 116                                            |          |
| <b>Sexual Health Outcomes</b>                      |                                                             |                                                     |          |                                                               |                                                     |          |
| <b>STI<sup>6</sup> diagnosis, past year</b>        |                                                             |                                                     |          |                                                               |                                                     |          |
| Reported Prevalence % (95% CI <sup>1</sup> )       | 0.8 (0.6-1.0)                                               | 4.1 (2.6-6.6)                                       |          | 0.9 (0.7-1.1)                                                 | 1.6 (0.6-4.2)                                       |          |
| OR <sup>2</sup> (95% CI <sup>1</sup> )             | 1.00                                                        | 5.6 (3.10-10.11)                                    | p<0.0001 | 1.00                                                          | 1.82 (0.65-5.07)                                    | 0.253    |

|                                          |            |                               |          |            |                  |        |
|------------------------------------------|------------|-------------------------------|----------|------------|------------------|--------|
| Age-Adjusted OR (95% CI <sup>1</sup> )   | -          | 4.16 (2.30-7.51)              | p<0.0001 | -          | 1.44 (0.51-4.10) | 0.4948 |
| AOR <sup>2,3</sup> (95%CI <sup>1</sup> ) | -          | 1.68 (0.71-3.97) <sup>4</sup> | 0.234    | -          | 0.68 (0.22-2.12) | 0.5091 |
| Denominators <sup>5</sup>                | 5208, 6461 | 378, 351                      |          | 7824, 6870 | 244, 167         |        |

**Emergency contraception use with a partner, last year**

|                                              |               |                  |          |               |                  |          |
|----------------------------------------------|---------------|------------------|----------|---------------|------------------|----------|
| Reported Prevalence % (95% CI <sup>1</sup> ) | 2.1 (1.8-2.5) | 6.7 (4.5-9.7)    |          | 1.6 (1.4-1.9) | 7.5 (4.3-12.8)   |          |
| OR <sup>2</sup> (95% CI <sup>1</sup> )       | 1.00          | 3.34 (2.16-5.14) | p<0.0001 | 1.00          | 4.94 (2.75-8.87) | p<0.0001 |
| Age-Adjusted OR (95% CI <sup>1</sup> )       | -             | 2.51 (1.63-3.86) | p<0.0001 | -             | 4.2 (2.22-7.98)  | p<0.0001 |
| AOR <sup>2,3</sup> (95%CI <sup>1</sup> )     | -             | 1.44 (0.92-2.25) | 0.1119   | -             | 2.14 (1.13-4.05) | 0.0194   |
| Denominators <sup>5</sup>                    | 5175, 6451    | 356, 329         |          | 7795, 6870    | 243, 167         |          |

Notes for Online Supplement 2

<sup>1</sup>CI= Confidence Interval

<sup>2</sup> OR= Odds Ratio

<sup>3</sup> Adjusted for age, partner number

<sup>4</sup> Additionally adjusted for reporting a same-sex partner in the past year

<sup>5</sup> Unweighted, weighted

<sup>6</sup> STI = Sexually Transmitted Infection
